# Supplementary material
Source: MDPI journal article supplement (https://www.mdpi.com/2673-7426/3/1/1)
Supplement: s1 [file s1]

Archive with 7 entries (7 files):
- FigureS1.jpg
- FigureS2.jpg
- FigureS3a.jpg
- FigureS3b.jpg
- SupplementaryFigureLegends.pdf
- TableS1.pdf
- TableS2.pdf
