# Supplementary material
Source: MDPI journal article supplement (https://www.mdpi.com/2673-7426/3/1/1)

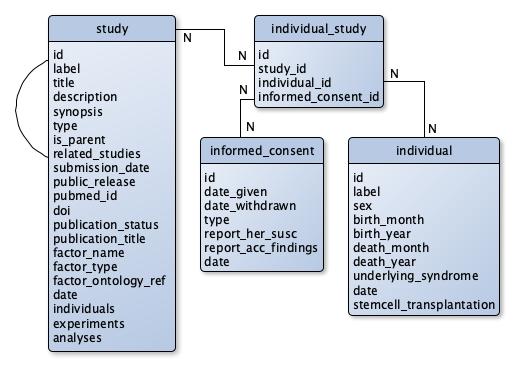

Supplement: s1 [file s1 › FigureS1.jpg]

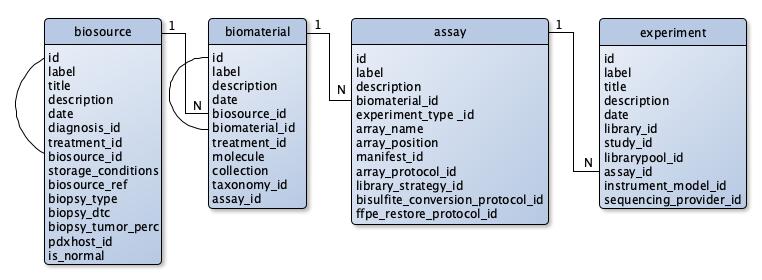

Supplement: s1 [file s1 › FigureS2.jpg]

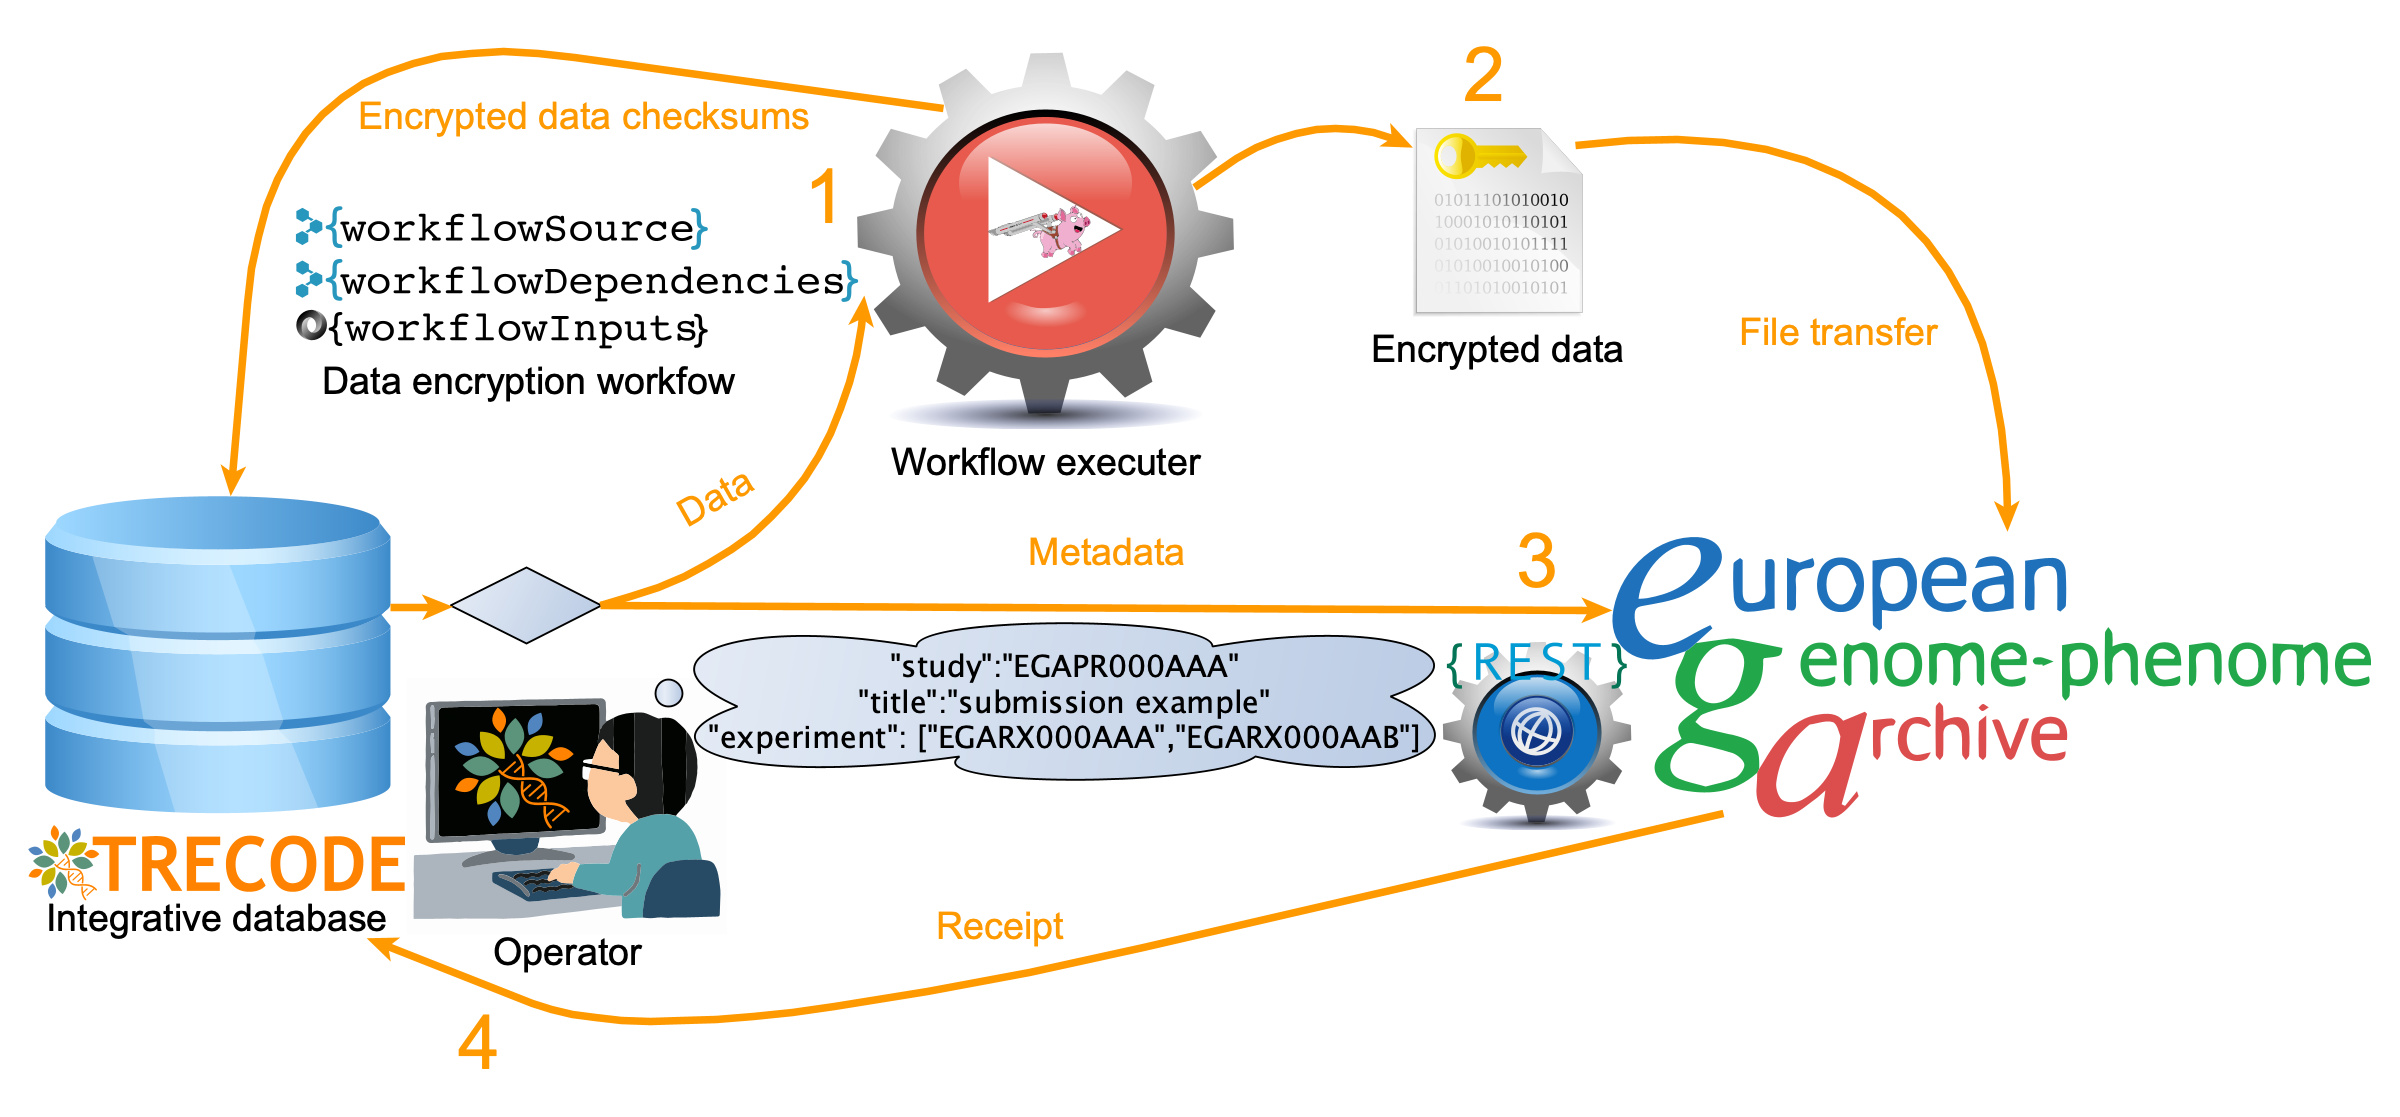

Supplement: s1 [file s1 › FigureS3a.jpg]

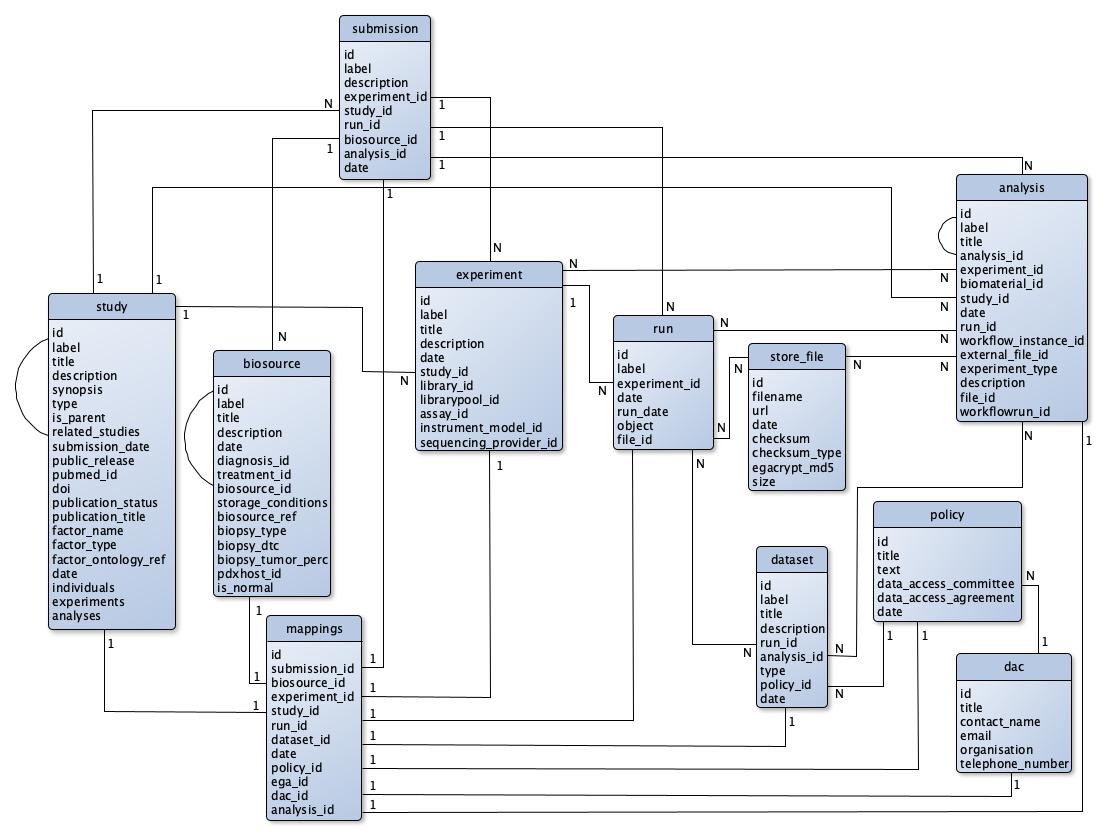

Supplement: s1 [file s1 › FigureS3b.jpg]
